# Supplementary material
Source: publisher site journal article supplement (https://cdn.jamanetwork.com/ama/content_public/journal/jamanetworkopen/939059/zoi221424supp1_prod_1672151835.33176.pdf)
Supplement: Supplementary file [file zoi221424supp1_prod_1672151835.33176.pdf]

## Supplemental Online Content

Geris JM, Schleiss MR, Hooten AJ, et al. Evaluation of the Association Between Congenital Cytomegalovirus Infection and Pediatric Acute Lymphoblastic Leukemia. *JAMA Netw Open*. 2023;6(1):e2250219. doi:10.1001/jamanetworkopen.2022.50219

**eTable.** Comparison of Cases With Available Leukemia Subtype to Cases Without, by Demographic Characteristics

This supplemental material has been provided by the authors to give readers additional information about their work.

eTable. Comparison of Cases With Available Leukemia Subtype to Cases Without, by Demographic Characteristics

| Characteristics               | Cases with subtype |       | Cases without subtype |       | p-value |
|-------------------------------|--------------------|-------|-----------------------|-------|---------|
|                               | (n=536)            | %     | (n=653)               | %     |         |
| Mean age at diagnosis (SD)    | 5.4 (3.6)          |       | 3.8 (2.8)             |       | <0.001  |
| Birth year                    |                    |       |                       |       | <0.001  |
| 1988-1992                     | 16                 | 3.0%  | 196                   | 30.0% |         |
| 1993-1997                     | 74                 | 13.8% | 252                   | 38.6% |         |
| 1998-2002                     | 168                | 31.3% | 147                   | 22.5% |         |
| 2003-2007                     | 182                | 34.0% | 55                    | 8.4%  |         |
| 2007-2012                     | 96                 | 17.9% | 3                     | 0.5%  |         |
| Sex                           |                    |       |                       |       |         |
| Female                        | 229                | 42.7% | 275                   | 42.1% |         |
| Male                          | 307                | 57.3% | 378                   | 57.9% |         |
| Mean birth weight, grams (SD) | 3418.3 (571.0)     |       | 3473.4 (580.7)        |       |         |
| Gestational Age               |                    |       |                       |       | 0.063   |
| <37 weeks                     | 49                 | 9.1%  | 41                    | 6.3%  |         |
| 37+ weeks                     | 487                | 90.9% | 612                   | 93.7% |         |
| Mother's age at birth, years  |                    |       |                       |       | 0.43    |
| <25                           | 148                | 27.6% | 198                   | 30.3% |         |
| 25-34                         | 306                | 57.1% | 373                   | 57.1% |         |
| 35+                           | 75                 | 14.0% | 78                    | 11.9% |         |
| Unknown                       | 7                  | 1.3%  | 4                     | 0.6%  |         |
| Mother's race/ethnicity       |                    |       |                       |       | 0.23    |
| White                         | 435                | 81.2% | 552                   | 84.5% |         |
| Black                         | 52                 | 9.7%  | 51                    | 7.8%  |         |
| Other                         | 9                  | 1.7%  | 17                    | 2.6%  |         |
| Hispanic                      | 31                 | 5.8%  | 25                    | 3.8%  |         |
| Unknown                       | 9                  | 1.7%  | 8                     | 1.2%  |         |

A total of 536 cases had immunophenotype subtype available for analysis (B-ALL: n=474; T-ALL: n=62). P-values calculated by Pearson's Chi-Square statistic for categorical variables or by two-sided t-test for continuous variables; Abbreviations: SD – standard deviation.
